# Supplementary material for: The association between food insecurity and mental health during the COVID-19 pandemic
Source: Springer Nature journal article supplement (doi:10.1186/s12889-021-10631-0), 2021-03-29
Supplement: MOESM1 [file 19016576]

**The Association Between Food Insecurity and Mental Health during the COVID-19  
Pandemic**

Di Fang, Michael R. Thomsen, Rodolfo M. Nayga, Jr.

**supplementary file**

Table S1: Summary Statistics

|            | Full |      | SNAP |      | 18-39 |      | 40-59 |      | 60+ |      | Children |      | No Child |      | Black |      | Hisp. |      | White |      |
|------------|------|------|------|------|-------|------|-------|------|-----|------|----------|------|----------|------|-------|------|-------|------|-------|------|
|            | m.   | s.d. | m.   | s.d. | m.    | s.d. | m.    | s.d. | m.  | s.d. | m.       | s.d. | m.       | s.d. | m.    | s.d. | m.    | s.d. | m.    | s.d. |
|            | 2714 |      | 1214 |      | 1102  |      | 717   |      | 895 |      | 887      |      | 1827     |      | 857   |      | 653   |      | 1130  |      |
| Depression | 8.2  | 7.3  | 9.1  | 7.2  | 11.0  | 7.3  | 8.2   | 7.1  | 4.7 | 5.7  | 10.2     | 7.4  | 7.2      | 7.0  | 7.8   | 7.2  | 9.6   | 7.3  | 7.6   | 7.2  |
| Anxiety    | 6.5  | 6.2  | 7.4  | 6.4  | 8.9   | 6.2  | 6.8   | 6.2  | 3.4 | 4.7  | 8.5      | 6.4  | 5.6      | 5.9  | 6.1   | 6.1  | 7.9   | 6.3  | 6.1   | 6.3  |
| Food       | 0.5  | 0.5  | 0.6  | 0.5  | 0.7   | 0.5  | 0.6   | 0.5  | 0.3 | 0.5  | 0.7      | 0.5  | 0.4      | 0.5  | 0.5   | 0.5  | 0.6   | 0.5  | 0.5   | 0.5  |
| Insecure   |      |      |      |      |       |      |       |      |     |      |          |      |          |      |       |      |       |      |       |      |
| Lost       | 0.2  | 0.4  | 0.2  | 0.4  | 0.3   | 0.5  | 0.2   | 0.4  | 0.1 | 0.2  | 0.3      | 0.5  | 0.1      | 0.4  | 0.2   | 0.4  | 0.3   | 0.4  | 0.1   | 0.3  |
| Job        |      |      |      |      |       |      |       |      |     |      |          |      |          |      |       |      |       |      |       |      |
| Income     | 0.6  | 0.5  | 0.6  | 0.5  | 0.4   | 0.5  | 0.6   | 0.5  | 0.9 | 0.3  | 0.5      | 0.5  | 0.7      | 0.5  | 0.6   | 0.5  | 0.5   | 0.5  | 0.7   | 0.4  |
| Stable     |      |      |      |      |       |      |       |      |     |      |          |      |          |      |       |      |       |      |       |      |
| SNAP       | 0.4  | 0.5  | 1.0  | 0.0  | 0.5   | 0.5  | 0.5   | 0.5  | 0.4 | 0.5  | 0.6      | 0.5  | 0.4      | 0.5  | 0.5   | 0.5  | 0.4   | 0.5  | 0.4   | 0.5  |
| Add.       | 0.2  | 0.4  | 0.5  | 0.5  | 0.3   | 0.4  | 0.3   | 0.4  | 0.2 | 0.4  | 0.3      | 0.5  | 0.2      | 0.4  | 0.3   | 0.5  | 0.2   | 0.4  | 0.2   | 0.4  |
| SNAP       |      |      |      |      |       |      |       |      |     |      |          |      |          |      |       |      |       |      |       |      |
| Add.       | 0.0  | 0.1  | 0.1  | 0.2  | 0.1   | 0.1  | 0.0   | 0.1  | 0.0 | 0.1  | 0.1      | 0.2  | 0.0      | 0.1  | 0.1   | 0.1  | 0.0   | 0.1  | 0.0   | 0.1  |
| SNAP       |      |      |      |      |       |      |       |      |     |      |          |      |          |      |       |      |       |      |       |      |
| Amt.       |      |      |      |      |       |      |       |      |     |      |          |      |          |      |       |      |       |      |       |      |
| WIC        | 0.1  | 0.3  | 0.1  | 0.4  | 0.2   | 0.4  | 0.0   | 0.2  | 0.0 | 0.1  | 0.2      | 0.4  | 0.0      | 0.2  | 0.1   | 0.3  | 0.1   | 0.3  | 0.1   | 0.2  |
| Alt.       | 0.2  | 0.4  | 0.2  | 0.4  | 0.3   | 0.5  | 0.1   | 0.3  | 0.0 | 0.2  | 0.4      | 0.5  | 0.0      | 0.2  | 0.2   | 0.4  | 0.2   | 0.4  | 0.1   | 0.3  |
| Meals      |      |      |      |      |       |      |       |      |     |      |          |      |          |      |       |      |       |      |       |      |
| Char.      | 0.3  | 0.5  | 0.4  | 0.5  | 0.4   | 0.5  | 0.3   | 0.5  | 0.2 | 0.4  | 0.4      | 0.5  | 0.3      | 0.4  | 0.4   | 0.5  | 0.3   | 0.5  | 0.2   | 0.4  |
| Food       |      |      |      |      |       |      |       |      |     |      |          |      |          |      |       |      |       |      |       |      |
| Unemp.     | 0.1  | 0.3  | 0.1  | 0.3  | 0.2   | 0.4  | 0.1   | 0.3  | 0.0 | 0.2  | 0.1      | 0.3  | 0.1      | 0.3  | 0.1   | 0.3  | 0.1   | 0.4  | 0.1   | 0.2  |
| Benefit    |      |      |      |      |       |      |       |      |     |      |          |      |          |      |       |      |       |      |       |      |

Table S1: Summary Statistics

|                  | Full | SNAP | 18-39 | 40-59 | 60+  | Children | No Child | Black | Hisp. | White |      |      |      |      |      |      |      |      |      |      |
|------------------|------|------|-------|-------|------|----------|----------|-------|-------|-------|------|------|------|------|------|------|------|------|------|------|
| Stimulus         | 0.7  | 0.4  | 0.8   | 0.4   | 0.9  | 0.3      | 0.7      | 0.5   | 0.7   | 0.5   | 0.8  | 0.4  |      |      |      |      |      |      |      |      |
| Female           | 0.7  | 0.4  | 0.7   | 0.4   | 0.7  | 0.4      | 0.8      | 0.4   | 0.7   | 0.4   | 0.7  | 0.5  |      |      |      |      |      |      |      |      |
| Age              | 46.8 | 18.6 | 45.2  | 17.4  | 27.3 | 6.3      | 50.0     | 6.2   | 68.3  | 5.7   | 36.2 | 13.4 | 51.9 | 18.6 | 44.1 | 18.5 | 37.9 | 15.9 | 54.4 | 17.3 |
| Pop.<1k          | 0.2  | 0.4  | 0.2   | 0.4   | 0.1  | 0.3      | 0.2      | 0.4   | 0.2   | 0.4   | 0.1  | 0.4  | 0.2  | 0.4  | 0.1  | 0.3  | 0.1  | 0.3  | 0.2  | 0.4  |
| Pop.1-100k       | 0.4  | 0.5  | 0.4   | 0.5   | 0.4  | 0.5      | 0.4      | 0.5   | 0.4   | 0.5   | 0.5  | 0.5  | 0.4  | 0.5  | 0.4  | 0.5  | 0.4  | 0.5  | 0.5  | 0.5  |
| Pop.>100k        | 0.4  | 0.5  | 0.4   | 0.5   | 0.4  | 0.5      | 0.4      | 0.5   | 0.4   | 0.5   | 0.4  | 0.5  | 0.4  | 0.5  | 0.5  | 0.5  | 0.5  | 0.5  | 0.3  | 0.5  |
| Married          | 0.2  | 0.4  | 0.2   | 0.4   | 0.2  | 0.4      | 0.3      | 0.4   | 0.2   | 0.4   | 0.3  | 0.5  | 0.2  | 0.4  | 0.2  | 0.4  | 0.3  | 0.4  | 0.3  | 0.4  |
| Num. Children    | 0.6  | 1.0  | 0.8   | 1.1   | 1.0  | 1.2      | 0.6      | 1.0   | 0.1   | 0.5   | 1.8  | 1.0  | 0.0  | 0.0  | 0.6  | 1.0  | 0.8  | 1.1  | 0.5  | 0.9  |
| Black            | 0.3  | 0.5  | 0.4   | 0.5   | 0.3  | 0.5      | 0.3      | 0.5   | 0.3   | 0.4   | 0.3  | 0.5  | 0.3  | 0.5  | 1.0  | 0.0  | 0.0  | 0.0  | 0.0  | 0.0  |
| Hispanic         | 0.2  | 0.4  | 0.2   | 0.4   | 0.4  | 0.5      | 0.2      | 0.4   | 0.1   | 0.3   | 0.3  | 0.5  | 0.2  | 0.4  | 0.0  | 0.0  | 1.0  | 0.0  | 0.0  | 0.0  |
| White            | 0.4  | 0.5  | 0.4   | 0.5   | 0.3  | 0.4      | 0.4      | 0.5   | 0.6   | 0.5   | 0.3  | 0.5  | 0.5  | 0.5  | 0.0  | 0.0  | 0.0  | 0.0  | 1.0  | 0.0  |
| Less High School | 0.1  | 0.2  | 0.1   | 0.3   | 0.1  | 0.2      | 0.1      | 0.2   | 0.0   | 0.2   | 0.1  | 0.2  | 0.0  | 0.2  | 0.1  | 0.2  | 0.1  | 0.2  | 0.0  | 0.2  |
| High School      | 0.3  | 0.5  | 0.3   | 0.5   | 0.4  | 0.5      | 0.3      | 0.5   | 0.3   | 0.5   | 0.4  | 0.5  | 0.3  | 0.5  | 0.3  | 0.5  | 0.3  | 0.5  | 0.4  | 0.5  |
| Some College     | 0.4  | 0.5  | 0.4   | 0.5   | 0.4  | 0.5      | 0.4      | 0.5   | 0.4   | 0.5   | 0.4  | 0.5  | 0.4  | 0.5  | 0.4  | 0.5  | 0.5  | 0.5  | 0.4  | 0.5  |
| College Higher   | 0.2  | 0.4  | 0.2   | 0.4   | 0.2  | 0.4      | 0.2      | 0.4   | 0.2   | 0.4   | 0.2  | 0.4  | 0.2  | 0.4  | 0.2  | 0.4  | 0.2  | 0.4  | 0.2  | 0.4  |
| <\$15,000        | 0.3  | 0.5  | 0.4   | 0.5   | 0.4  | 0.5      | 0.4      | 0.5   | 0.3   | 0.4   | 0.3  | 0.4  | 0.4  | 0.4  | 0.5  | 0.4  | 0.5  | 0.3  | 0.5  | 0.3  |

Table S1: Summary Statistics

|                | Full | SNAP | 18-39 | 40-59 | 60+ | Children | No Child | Black | Hisp. | White |
|----------------|------|------|-------|-------|-----|----------|----------|-------|-------|-------|
| \$15k-\$29,999 | 0.4  | 0.5  | 0.4   | 0.5   | 0.6 | 0.4      | 0.5      | 0.4   | 0.5   | 0.5   |
| \$30k-\$44,999 | 0.2  | 0.4  | 0.1   | 0.3   | 0.2 | 0.3      | 0.4      | 0.1   | 0.3   | 0.4   |
| >\$45,000      | 0.0  | 0.2  | 0.1   | 0.2   | 0.0 | 0.1      | 0.3      | 0.0   | 0.1   | 0.2   |
| Food           | 0.1  | 0.3  | 0.1   | 0.3   | 0.1 | 0.2      | 0.4      | 0.1   | 0.3   | 0.3   |
| Dessert        |      |      |       |       |     |          |          |       |       |       |

Table S2: Odds Ratio for Anxiety by Subsample

|                | <i>Dependent variable: Anxiety</i> |          |          |         |          |             |         |          |         |
|----------------|------------------------------------|----------|----------|---------|----------|-------------|---------|----------|---------|
|                | SNAP                               | age18-39 | age40-59 | age60+  | children | no-children | black   | hispanic | white   |
|                | (1)                                | (2)      | (3)      | (4)     | (5)      | (6)         | (7)     | (8)      | (9)     |
| Food Insecure  | 3.64***                            | 3.62***  | 3.41***  | 4.15*** | 4.36***  | 3.35***     | 3.60*** | 3.99***  | 3.54*** |
| Lost Job       | 1.25                               | 1.30*    | 1.43     | 1.53    | 1.22     | 1.42*       | 1.21    | 1.23     | 1.56*   |
| Income Stable  | 0.89                               | 0.87     | 0.98     | 0.77    | 0.93     | 0.86        | 0.80    | 0.94     | 1.08    |
| SNAP           |                                    | 1.24     | 1.30     | 0.73    | 1.06     | 1.19        | 1.35    | 1.10     | 1.14    |
| Add.SNAP       | 1.01                               | 0.81     | 1.24     | 1.22    | 0.99     | 0.98        | 1.17    | 0.90     | 0.86    |
| WIC            | 0.94                               | 0.98     | 0.99     | 2.81    | 1.11     | 0.56*       | 1.08    | 0.68     | 0.71    |
| Alt. Meals     | 1.08                               | 1.15     | 1.41     | 0.47    | 1.21     | 1.04        | 1.04    | 1.10     | 0.99    |
| Chari. Foods   | 1.15                               | 1.38*    | 1.22     | 1.69**  | 1.20     | 1.56***     | 1.39*   | 1.71**   | 1.25    |
| Unemp. Benefit | 0.92                               | 0.89     | 0.84     | 1.21    | 1.09     | 0.76        | 0.90    | 0.92     | 0.71    |
| Stimulus       | 1.00                               | 1.05     | 0.95     | 0.86    | 0.81     | 1.20        | 0.89    | 1.18     | 1.08    |
| Female         | 1.24                               | 1.32*    | 1.32     | 1.03    | 1.42*    | 1.19        | 1.08    | 1.76**   | 1.09    |
| Age            | 0.96***                            |          |          |         | 0.97***  | 0.97***     | 0.97*** | 0.97***  | 0.96*** |
| Pop.> 100k     | 0.73                               | 0.73     | 0.77     | 0.65    | 0.53**   | 0.85        | 0.77    | 0.53*    | 0.77    |
| Pop.1k-100k    | 0.84                               | 0.81     | 0.68     | 1.27    | 0.59**   | 1.02        | 0.79    | 0.67     | 0.99    |
| Married        | 0.87                               | 0.70*    | 0.89     | 0.84    | 0.84     | 0.90        | 0.78    | 0.94     | 0.88    |
| Children       | 1.03                               | 1.09     | 1.02     | 1.28    |          |             | 1.14    | 1.04     | 1.10    |
| Black          | 1.06                               | 1.14     | 0.88     | 0.55    | 1.47     | 0.78        |         |          |         |
| Hispanic       | 1.33                               | 1.40     | 1.95     | 0.81    | 2.33*    | 1.12        |         |          |         |
| White          | 1.46                               | 1.38     | 1.54     | 0.92    | 2.36*    | 1.21        |         |          |         |
| High School    | 1.25                               | 1.41     | 1.12     | 0.51    | 0.78     | 1.19        | 1.06    | 1.39     | 0.91    |
| Some College   | 1.51                               | 1.98*    | 1.31     | 0.58    | 1.08     | 1.38        | 1.28    | 2.20*    | 0.96    |
| College Higher | 1.22                               | 1.47     | 1.36     | 0.77    | 0.93     | 1.43        | 1.09    | 1.66     | 1.24    |
| 15k-29,999     | 0.87                               | 0.85     | 0.95     | 1.27    | 1.12     | 0.94        | 1.03    | 0.80     | 1.03    |
| 30k-44,999     | 0.79                               | 0.94     | 0.90     | 1.44    | 1.06     | 1.02        | 1.12    | 1.03     | 0.87    |
| >45k           | 0.89                               | 0.91     | 0.47     | 0.14    | 0.66     | 1.48        | 1.28    | 0.49     | 0.54    |
| Food Dessert   | 1.01                               | 1.18     | 1.01     | 0.91    | 0.88     | 1.19        | 1.11    | 1.18     | 0.94    |
| Observations   | 1,210                              | 1,101    | 712      | 893     | 883      | 1,823       | 856     | 648      | 1,128   |

*Note:* \*p<0.05; \*\*p<0.01; \*\*\*p<0.001

Table S3: Odds Ratio for Depression by Subsample

|                | <i>Dependent variable: Depression</i> |          |          |         |          |             |         |          |         |
|----------------|---------------------------------------|----------|----------|---------|----------|-------------|---------|----------|---------|
|                | SNAP                                  | age18-39 | age40-59 | age60+  | children | no-children | black   | hispanic | white   |
|                | (1)                                   | (2)      | (3)      | (4)     | (5)      | (6)         | (7)     | (8)      | (9)     |
| Food Insecure  | 3.50***                               | 3.81***  | 3.52***  | 4.00*** | 4.03***  | 3.42***     | 3.21*** | 3.71***  | 3.76*** |
| Lost Job       | 1.30                                  | 1.18     | 1.39     | 1.95*   | 1.28     | 1.30        | 1.30    | 1.20     | 1.36    |
| Income Stable  | 0.70**                                | 0.72**   | 0.86     | 0.76    | 0.80     | 0.75**      | 0.74*   | 0.77     | 0.89    |
| SNAP           |                                       | 1.27     | 1.10     | 0.93    | 1.10     | 1.09        | 1.19    | 1.21     | 1.03    |
| Add.SNAP       | 1.02                                  | 0.82     | 1.16     | 1.17    | 0.92     | 1.07        | 1.24    | 0.72     | 1.01    |
| WIC            | 0.97                                  | 0.97     | 1.01     | 1.91    | 1.04     | 0.61        | 1.15    | 0.61*    | 0.90    |
| Alt. Meals     | 1.07                                  | 1.20     | 1.47     | 0.22*   | 1.12     | 1.35        | 1.14    | 1.25     | 0.95    |
| Chari. Foods   | 1.22                                  | 1.31*    | 1.18     | 1.77**  | 1.11     | 1.60***     | 1.20    | 1.50*    | 1.53**  |
| Unemp. Benefit | 0.76                                  | 0.98     | 0.82     | 0.83    | 1.16     | 0.73        | 1.05    | 0.85     | 0.69    |
| Stimulus       | 1.08                                  | 1.00     | 0.91     | 0.92    | 0.83     | 1.11        | 0.88    | 1.20     | 0.93    |
| Female         | 1.01                                  | 1.21     | 1.30     | 0.85    | 1.34     | 1.05        | 0.84    | 1.65**   | 1.06    |
| Age            | 0.96***                               |          |          |         | 0.97***  | 0.97***     | 0.97*** | 0.97***  | 0.97*** |
| Pop.> 100k     | 0.80                                  | 0.78     | 0.97     | 0.99    | 0.67*    | 1.06        | 0.78    | 0.90     | 0.97    |
| Pop.1k-100k    | 0.85                                  | 0.77     | 0.81     | 1.36    | 0.67*    | 1.08        | 0.70    | 1.00     | 1.06    |
| Married        | 0.94                                  | 0.75*    | 0.87     | 0.80    | 0.89     | 0.89        | 0.72    | 0.85     | 0.97    |
| Children       | 0.96                                  | 1.02     | 0.97     | 1.32    |          |             | 1.07    | 1.06     | 0.99    |
| Black          | 0.84                                  | 1.03     | 0.63     | 1.27    | 1.33     | 0.70        |         |          |         |
| Hispanic       | 1.02                                  | 1.20     | 1.25     | 1.54    | 2.02*    | 0.89        |         |          |         |
| White          | 1.19                                  | 1.25     | 1.05     | 2.21    | 2.02*    | 1.14        |         |          |         |
| High School    | 1.19                                  | 1.17     | 0.88     | 0.88    | 0.92     | 1.07        | 1.26    | 1.26     | 0.82    |
| Some College   | 1.44                                  | 1.30     | 1.06     | 1.05    | 1.12     | 1.18        | 1.39    | 1.49     | 0.92    |
| College Higher | 1.23                                  | 1.10     | 0.74     | 1.29    | 1.04     | 1.09        | 1.28    | 1.10     | 1.00    |
| 15,000-29,999  | 0.86                                  | 0.72*    | 0.89     | 1.43*   | 0.82     | 0.98        | 1.03    | 0.66*    | 1.01    |
| 30,000-44,999  | 1.00                                  | 0.91     | 0.95     | 1.55    | 0.88     | 1.13        | 1.13    | 0.93     | 0.98    |
| >45,000        | 0.80                                  | 0.80     | 0.47     | 0.27    | 0.56*    | 1.17        | 1.07    | 0.43*    | 0.58    |
| Food Dessert   | 0.93                                  | 0.92     | 0.76     | 0.94    | 0.76     | 0.94        | 0.80    | 1.37     | 0.83    |
| Observations   | 1,210                                 | 1,101    | 712      | 893     | 883      | 1,823       | 856     | 648      | 1,128   |

*Note:* \*p<0.05; \*\*p<0.01; \*\*\*p<0.001
